# Supplementary material for: Parkinson’s Disease and Diabetes Mellitus: Individual and Combined Effects on Motor, Cognitive, and Psychosocial Functions
Source: MDPI journal article supplement (doi:10.3390/healthcare11091316), 2023-05-04
Supplement: s1 [file s1]

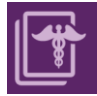

Supplementary Table S1. Participant Performance on Motor, Motor-Cognitive, and Cognitive Assessments.

|  | HOA         |            | PD-Only     |            | DM-Only    |            | PD+DM      |            | Main effect of PD |         |                |                   |         |                | Main effect of DM |         |                |         |         |                | PD X DM           |         |                |                   |         |                | Main effect of PD |         |                |                   |         |                | Main effect of DM |         |                |         |         |                | PD X DM           |         |                |                   |         |                | Main effect of PD |         |                |                   |         |                | Main effect of DM |         |                |         |         |                | PD X DM |         |                |   |         |                | Main effect of PD |         |                |   |         |                | Main effect of DM |         |                |   |         |                | PD X DM |         |                |   |         |                |   |         |                |   |         |                |   |         |                |   |         |                |   |         |                |   |         |                |   |         |                |   |         |                |   |         |                |   |         |                |   |         |                |   |         |                |   |         |                |   |         |                |   |         |                |   |         |                |   |         |                |   |         |                |   |         |                |   |         |                |   |         |                |   |         |                |   |         |                |   |         |                |   |         |                |   |         |                |   |         |                |   |         |                |   |         |                |   |         |                |   |         |                |   |         |                |   |         |                |   |         |                |   |         |                |   |         |                |   |         |                |   |         |                |   |         |                |   |         |                |   |         |                |   |         |                |   |         |                |   |         |                |   |         |                |   |         |                |   |         |                |   |         |                |   |         |                |   |         |                |   |         |                |   |         |                |   |         |                |   |         |                |   |         |                |   |         |                |   |         |                |   |         |                |   |         |                |   |         |                |   |         |                |   |         |                |   |         |                |   |         |                |   |         |                |   |         |                |   |         |                |   |         |                |   |         |                |   |         |                |   |         |                |   |         |                |   |         |                |   |         |                |   |         |                |   |         |                |   |         |                |   |         |                |   |         |                |   |         |                |   |         |                |   |         |                |   |         |                |   |         |                |   |         |                |   |         |                |   |         |                |   |         |                |   |         |                |   |         |                |   |         |                |   |         |                |   |         |                |   |         |                |   |         |                |   |         |                |   |         |                |   |         |                |   |         |                |   |         |                |   |         |                |   |         |                |   |         |                |   |         |                |   |         |                |   |         |                |   |         |                |   |         |                |   |         |                |   |         |                |   |         |                |   |         |                |   |         |                |   |         |                |   |         |                |   |         |                |   |         |                |   |         |                |   |         |                |   |         |                |   |         |                |   |         |                |   |         |                |   |         |                |   |         |                |   |         |                |   |         |                |   |         |                |   |         |                |   |         |                |   |         |                |   |         |                |   |         |                |   |         |                |   |         |                |   |         |                |   |         |                |   |         |                |   |         |                |   |         |                |   |         |                |   |         |                |   |         |                |   |         |                |   |         |                |   |         |                |   |         |                |   |         |                |   |         |                |   |         |                |   |         |                |   |         |                |   |         |                |   |         |                |   |         |                |   |         |                |   |         |                |   |         |                |   |         |                |   |         |                |   |         |                |   |         |                |   |         |                |   |         |                |   |         |                |   |         |                |   |         |                |   |         |                |   |         |                |   |         |                |   |         |                |   |         |                |   |         |                |   |         |                |   |         |                |   |         |                |   |         |                |   |         |                |   |         |                |   |         |                |   |         |                |   |         |                |   |         |                |   |         |                |   |         |                |   |         |                |   |         |                |   |         |                |   |         |                |   |         |                |   |         |                |   |         |                |   |         |                |   |         |                |   |         |                |   |         |                |   |         |                |   |         |                |   |         |                |   |         |                |   |         |                |   |         |                |   |         |                |   |         |                |   |         |                |   |         |                |   |         |                |   |         |                |   |         |                |   |         |                |   |         |                |   |         |                |   |         |                |   |         |                |   |         |                |   |         |                |   |         |                |   |         |                |   |         |                |   |         |                |   |         |                |   |         |                |   |         |                |   |         |                |   |         |                |   |         |                |   |         |                |   |         |                |   |         |                |   |         |                |   |         |                |   |         |                |   |         |                |   |         |                |   |         |                |   |         |                |   |         |                |   |         |                |   |         |                |   |         |                |   |         |                |   |         |                |   |         |                |   |         |                |   |         |                |   |         |                |   |         |                |   |         |                |   |         |                |   |         |                |   |         |
|--|-------------|------------|-------------|------------|------------|------------|------------|------------|-------------------|---------|----------------|-------------------|---------|----------------|-------------------|---------|----------------|---------|---------|----------------|-------------------|---------|----------------|-------------------|---------|----------------|-------------------|---------|----------------|-------------------|---------|----------------|-------------------|---------|----------------|---------|---------|----------------|-------------------|---------|----------------|-------------------|---------|----------------|-------------------|---------|----------------|-------------------|---------|----------------|-------------------|---------|----------------|---------|---------|----------------|---------|---------|----------------|---|---------|----------------|-------------------|---------|----------------|---|---------|----------------|-------------------|---------|----------------|---|---------|----------------|---------|---------|----------------|---|---------|----------------|---|---------|----------------|---|---------|----------------|---|---------|----------------|---|---------|----------------|---|---------|----------------|---|---------|----------------|---|---------|----------------|---|---------|----------------|---|---------|----------------|---|---------|----------------|---|---------|----------------|---|---------|----------------|---|---------|----------------|---|---------|----------------|---|---------|----------------|---|---------|----------------|---|---------|----------------|---|---------|----------------|---|---------|----------------|---|---------|----------------|---|---------|----------------|---|---------|----------------|---|---------|----------------|---|---------|----------------|---|---------|----------------|---|---------|----------------|---|---------|----------------|---|---------|----------------|---|---------|----------------|---|---------|----------------|---|---------|----------------|---|---------|----------------|---|---------|----------------|---|---------|----------------|---|---------|----------------|---|---------|----------------|---|---------|----------------|---|---------|----------------|---|---------|----------------|---|---------|----------------|---|---------|----------------|---|---------|----------------|---|---------|----------------|---|---------|----------------|---|---------|----------------|---|---------|----------------|---|---------|----------------|---|---------|----------------|---|---------|----------------|---|---------|----------------|---|---------|----------------|---|---------|----------------|---|---------|----------------|---|---------|----------------|---|---------|----------------|---|---------|----------------|---|---------|----------------|---|---------|----------------|---|---------|----------------|---|---------|----------------|---|---------|----------------|---|---------|----------------|---|---------|----------------|---|---------|----------------|---|---------|----------------|---|---------|----------------|---|---------|----------------|---|---------|----------------|---|---------|----------------|---|---------|----------------|---|---------|----------------|---|---------|----------------|---|---------|----------------|---|---------|----------------|---|---------|----------------|---|---------|----------------|---|---------|----------------|---|---------|----------------|---|---------|----------------|---|---------|----------------|---|---------|----------------|---|---------|----------------|---|---------|----------------|---|---------|----------------|---|---------|----------------|---|---------|----------------|---|---------|----------------|---|---------|----------------|---|---------|----------------|---|---------|----------------|---|---------|----------------|---|---------|----------------|---|---------|----------------|---|---------|----------------|---|---------|----------------|---|---------|----------------|---|---------|----------------|---|---------|----------------|---|---------|----------------|---|---------|----------------|---|---------|----------------|---|---------|----------------|---|---------|----------------|---|---------|----------------|---|---------|----------------|---|---------|----------------|---|---------|----------------|---|---------|----------------|---|---------|----------------|---|---------|----------------|---|---------|----------------|---|---------|----------------|---|---------|----------------|---|---------|----------------|---|---------|----------------|---|---------|----------------|---|---------|----------------|---|---------|----------------|---|---------|----------------|---|---------|----------------|---|---------|----------------|---|---------|----------------|---|---------|----------------|---|---------|----------------|---|---------|----------------|---|---------|----------------|---|---------|----------------|---|---------|----------------|---|---------|----------------|---|---------|----------------|---|---------|----------------|---|---------|----------------|---|---------|----------------|---|---------|----------------|---|---------|----------------|---|---------|----------------|---|---------|----------------|---|---------|----------------|---|---------|----------------|---|---------|----------------|---|---------|----------------|---|---------|----------------|---|---------|----------------|---|---------|----------------|---|---------|----------------|---|---------|----------------|---|---------|----------------|---|---------|----------------|---|---------|----------------|---|---------|----------------|---|---------|----------------|---|---------|----------------|---|---------|----------------|---|---------|----------------|---|---------|----------------|---|---------|----------------|---|---------|----------------|---|---------|----------------|---|---------|----------------|---|---------|----------------|---|---------|----------------|---|---------|----------------|---|---------|----------------|---|---------|----------------|---|---------|----------------|---|---------|----------------|---|---------|----------------|---|---------|----------------|---|---------|----------------|---|---------|----------------|---|---------|----------------|---|---------|----------------|---|---------|----------------|---|---------|----------------|---|---------|----------------|---|---------|----------------|---|---------|----------------|---|---------|----------------|---|---------|----------------|---|---------|----------------|---|---------|----------------|---|---------|----------------|---|---------|----------------|---|---------|----------------|---|---------|----------------|---|---------|----------------|---|---------|----------------|---|---------|----------------|---|---------|----------------|---|---------|----------------|---|---------|----------------|---|---------|----------------|---|---------|----------------|---|---------|----------------|---|---------|----------------|---|---------|----------------|---|---------|----------------|---|---------|----------------|---|---------|----------------|---|---------|----------------|---|---------|----------------|---|---------|----------------|---|---------|----------------|---|---------|----------------|---|---------|----------------|---|---------|----------------|---|---------|----------------|---|---------|----------------|---|---------|----------------|---|---------|----------------|---|---------|----------------|---|---------|----------------|---|---------|----------------|---|---------|----------------|---|---------|----------------|---|---------|----------------|---|---------|----------------|---|---------|----------------|---|---------|----------------|---|---------|----------------|---|---------|----------------|---|---------|----------------|---|---------|----------------|---|---------|----------------|---|---------|----------------|---|---------|----------------|---|---------|----------------|---|---------|----------------|---|---------|----------------|---|---------|----------------|---|---------|----------------|---|---------|----------------|---|---------|----------------|---|---------|----------------|---|---------|----------------|---|---------|----------------|---|---------|----------------|---|---------|----------------|---|---------|----------------|---|---------|----------------|---|---------|----------------|---|---------|----------------|---|---------|----------------|---|---------|----------------|---|---------|----------------|---|---------|----------------|---|---------|----------------|---|---------|----------------|---|---------|----------------|---|---------|----------------|---|---------|
|  | Total n=170 |            | Total n=162 |            | Total n=56 |            | Total n=36 |            | df                |         |                | Main effect of PD |         |                | Main effect of DM |         |                | PD X DM |         |                | Main effect of PD |         |                | Main effect of DM |         |                | PD X DM           |         |                | Main effect of PD |         |                | Main effect of DM |         |                | PD X DM |         |                | Main effect of PD |         |                | Main effect of DM |         |                | PD X DM           |         |                | Main effect of PD |         |                | Main effect of DM |         |                | PD X DM |         |                |         |         |                |   |         |                |                   |         |                |   |         |                |                   |         |                |   |         |                |         |         |                |   |         |                |   |         |                |   |         |                |   |         |                |   |         |                |   |         |                |   |         |                |   |         |                |   |         |                |   |         |                |   |         |                |   |         |                |   |         |                |   |         |                |   |         |                |   |         |                |   |         |                |   |         |                |   |         |                |   |         |                |   |         |                |   |         |                |   |         |                |   |         |                |   |         |                |   |         |                |   |         |                |   |         |                |   |         |                |   |         |                |   |         |                |   |         |                |   |         |                |   |         |                |   |         |                |   |         |                |   |         |                |   |         |                |   |         |                |   |         |                |   |         |                |   |         |                |   |         |                |   |         |                |   |         |                |   |         |                |   |         |                |   |         |                |   |         |                |   |         |                |   |         |                |   |         |                |   |         |                |   |         |                |   |         |                |   |         |                |   |         |                |   |         |                |   |         |                |   |         |                |   |         |                |   |         |                |   |         |                |   |         |                |   |         |                |   |         |                |   |         |                |   |         |                |   |         |                |   |         |                |   |         |                |   |         |                |   |         |                |   |         |                |   |         |                |   |         |                |   |         |                |   |         |                |   |         |                |   |         |                |   |         |                |   |         |                |   |         |                |   |         |                |   |         |                |   |         |                |   |         |                |   |         |                |   |         |                |   |         |                |   |         |                |   |         |                |   |         |                |   |         |                |   |         |                |   |         |                |   |         |                |   |         |                |   |         |                |   |         |                |   |         |                |   |         |                |   |         |                |   |         |                |   |         |                |   |         |                |   |         |                |   |         |                |   |         |                |   |         |                |   |         |                |   |         |                |   |         |                |   |         |                |   |         |                |   |         |                |   |         |                |   |         |                |   |         |                |   |         |                |   |         |                |   |         |                |   |         |                |   |         |                |   |         |                |   |         |                |   |         |                |   |         |                |   |         |                |   |         |                |   |         |                |   |         |                |   |         |                |   |         |                |   |         |                |   |         |                |   |         |                |   |         |                |   |         |                |   |         |                |   |         |                |   |         |                |   |         |                |   |         |                |   |         |                |   |         |                |   |         |                |   |         |                |   |         |                |   |         |                |   |         |                |   |         |                |   |         |                |   |         |                |   |         |                |   |         |                |   |         |                |   |         |                |   |         |                |   |         |                |   |         |                |   |         |                |   |         |                |   |         |                |   |         |                |   |         |                |   |         |                |   |         |                |   |         |                |   |         |                |   |         |                |   |         |                |   |         |                |   |         |                |   |         |                |   |         |                |   |         |                |   |         |                |   |         |                |   |         |                |   |         |                |   |         |                |   |         |                |   |         |                |   |         |                |   |         |                |   |         |                |   |         |                |   |         |                |   |         |                |   |         |                |   |         |                |   |         |                |   |         |                |   |         |                |   |         |                |   |         |                |   |         |                |   |         |                |   |         |                |   |         |                |   |         |                |   |         |                |   |         |                |   |         |                |   |         |                |   |         |                |   |         |                |   |         |                |   |         |                |   |         |                |   |         |                |   |         |                |   |         |                |   |         |                |   |         |                |   |         |                |   |         |                |   |         |                |   |         |                |   |         |                |   |         |                |   |         |                |   |         |                |   |         |                |   |         |                |   |         |                |   |         |                |   |         |                |   |         |                |   |         |                |   |         |                |   |         |                |   |         |                |   |         |                |   |         |                |   |         |                |   |         |                |   |         |                |   |         |                |   |         |                |   |         |                |   |         |                |   |         |                |   |         |                |   |         |                |   |         |                |   |         |                |   |         |                |   |         |                |   |         |                |   |         |
|  | n           | Mean ± STD | n           | Mean ± STD | n          | Mean ± STD | n          | Mean ± STD | F                 | p-value | η <sup>2</sup> | F                 | p-value | η <sup>2</sup> | F                 | p-value | η <sup>2</sup> | F       | p-value | η <sup>2</sup> | F                 | p-value | η <sup>2</sup> | F                 | p-value | η <sup>2</sup> | F                 | p-value | η <sup>2</sup> | F                 | p-value | η <sup>2</sup> | F                 | p-value | η <sup>2</sup> | F       | p-value | η <sup>2</sup> | F                 | p-value | η <sup>2</sup> | F                 | p-value | η <sup>2</sup> | F                 | p-value | η <sup>2</sup> | F                 | p-value | η <sup>2</sup> | F                 | p-value | η <sup>2</sup> | F       | p-value | η <sup>2</sup> | F       | p-value | η <sup>2</sup> | F | p-value | η <sup>2</sup> | F                 | p-value | η <sup>2</sup> | F | p-value | η <sup>2</sup> | F                 | p-value | η <sup>2</sup> | F | p-value | η <sup>2</sup> | F       | p-value | η <sup>2</sup> | F | p-value | η <sup>2</sup> | F | p-value | η <sup>2</sup> | F | p-value | η <sup>2</sup> | F | p-value | η <sup>2</sup> | F | p-value | η <sup>2</sup> | F | p-value | η <sup>2</sup> | F | p-value | η <sup>2</sup> | F | p-value | η <sup>2</sup> | F | p-value | η <sup>2</sup> | F | p-value | η <sup>2</sup> | F | p-value | η <sup>2</sup> | F | p-value | η <sup>2</sup> | F | p-value | η <sup>2</sup> | F | p-value | η <sup>2</sup> | F | p-value | η <sup>2</sup> | F | p-value | η <sup>2</sup> | F | p-value | η <sup>2</sup> | F | p-value | η <sup>2</sup> | F | p-value | η <sup>2</sup> | F | p-value | η <sup>2</sup> | F | p-value | η <sup>2</sup> | F | p-value | η <sup>2</sup> | F | p-value | η <sup>2</sup> | F | p-value | η <sup>2</sup> | F | p-value | η <sup>2</sup> | F | p-value | η <sup>2</sup> | F | p-value | η <sup>2</sup> | F | p-value | η <sup>2</sup> | F | p-value | η <sup>2</sup> | F | p-value | η <sup>2</sup> | F | p-value | η <sup>2</sup> | F | p-value | η <sup>2</sup> | F | p-value | η <sup>2</sup> | F | p-value | η <sup>2</sup> | F | p-value | η <sup>2</sup> | F | p-value | η <sup>2</sup> | F | p-value | η <sup>2</sup> | F | p-value | η <sup>2</sup> | F | p-value | η <sup>2</sup> | F | p-value | η <sup>2</sup> | F | p-value | η <sup>2</sup> | F | p-value | η <sup>2</sup> | F | p-value | η <sup>2</sup> | F | p-value | η <sup>2</sup> | F | p-value | η <sup>2</sup> | F | p-value | η <sup>2</sup> | F | p-value | η <sup>2</sup> | F | p-value | η <sup>2</sup> | F | p-value | η <sup>2</sup> | F | p-value | η <sup>2</sup> | F | p-value | η <sup>2</sup> | F | p-value | η <sup>2</sup> | F | p-value | η <sup>2</sup> | F | p-value | η <sup>2</sup> | F | p-value | η <sup>2</sup> | F | p-value | η <sup>2</sup> | F | p-value | η <sup>2</sup> | F | p-value | η <sup>2</sup> | F | p-value | η <sup>2</sup> | F | p-value | η <sup>2</sup> | F | p-value | η <sup>2</sup> | F | p-value | η <sup>2</sup> | F | p-value | η <sup>2</sup> | F | p-value | η <sup>2</sup> | F | p-value | η <sup>2</sup> | F | p-value | η <sup>2</sup> | F | p-value | η <sup>2</sup> | F | p-value | η <sup>2</sup> | F | p-value | η <sup>2</sup> | F | p-value | η <sup>2</sup> | F | p-value | η <sup>2</sup> | F | p-value | η <sup>2</sup> | F | p-value | η <sup>2</sup> | F | p-value | η <sup>2</sup> | F | p-value | η <sup>2</sup> | F | p-value | η <sup>2</sup> | F | p-value | η <sup>2</sup> | F | p-value | η <sup>2</sup> | F | p-value | η <sup>2</sup> | F | p-value | η <sup>2</sup> | F | p-value | η <sup>2</sup> | F | p-value | η <sup>2</sup> | F | p-value | η <sup>2</sup> | F | p-value | η <sup>2</sup> | F | p-value | η <sup>2</sup> | F | p-value | η <sup>2</sup> | F | p-value | η <sup>2</sup> | F | p-value | η <sup>2</sup> | F | p-value | η <sup>2</sup> | F | p-value | η <sup>2</sup> | F | p-value | η <sup>2</sup> | F | p-value | η <sup>2</sup> | F | p-value | η <sup>2</sup> | F | p-value | η <sup>2</sup> | F | p-value | η <sup>2</sup> | F | p-value | η <sup>2</sup> | F | p-value | η <sup>2</sup> | F | p-value | η <sup>2</sup> | F | p-value | η <sup>2</sup> | F | p-value | η <sup>2</sup> | F | p-value | η <sup>2</sup> | F | p-value | η <sup>2</sup> | F | p-value | η <sup>2</sup> | F | p-value | η <sup>2</sup> | F | p-value | η <sup>2</sup> | F | p-value | η <sup>2</sup> | F | p-value | η <sup>2</sup> | F | p-value | η <sup>2</sup> | F | p-value | η <sup>2</sup> | F | p-value | η <sup>2</sup> | F | p-value | η <sup>2</sup> | F | p-value | η <sup>2</sup> | F | p-value | η <sup>2</sup> | F | p-value | η <sup>2</sup> | F | p-value | η <sup>2</sup> | F | p-value | η <sup>2</sup> | F | p-value | η <sup>2</sup> | F | p-value | η <sup>2</sup> | F | p-value | η <sup>2</sup> | F | p-value | η <sup>2</sup> | F | p-value | η <sup>2</sup> | F | p-value | η <sup>2</sup> | F | p-value | η <sup>2</sup> | F | p-value | η <sup>2</sup> | F | p-value | η <sup>2</sup> | F | p-value | η <sup>2</sup> | F | p-value | η <sup>2</sup> | F | p-value | η <sup>2</sup> | F | p-value | η <sup>2</sup> | F | p-value | η <sup>2</sup> | F | p-value | η <sup>2</sup> | F | p-value | η <sup>2</sup> | F | p-value | η <sup>2</sup> | F | p-value | η <sup>2</sup> | F | p-value | η <sup>2</sup> | F | p-value | η <sup>2</sup> | F | p-value | η <sup>2</sup> | F | p-value | η <sup>2</sup> | F | p-value | η <sup>2</sup> | F | p-value | η <sup>2</sup> | F | p-value | η <sup>2</sup> | F | p-value | η <sup>2</sup> | F | p-value | η <sup>2</sup> | F | p-value | η <sup>2</sup> | F | p-value | η <sup>2</sup> | F | p-value | η <sup>2</sup> | F | p-value | η <sup>2</sup> | F | p-value | η <sup>2</sup> | F | p-value | η <sup>2</sup> | F | p-value | η <sup>2</sup> | F | p-value | η <sup>2</sup> | F | p-value | η <sup>2</sup> | F | p-value | η <sup>2</sup> | F | p-value | η <sup>2</sup> | F | p-value | η <sup>2</sup> | F | p-value | η <sup>2</sup> | F | p-value | η <sup>2</sup> | F | p-value | η <sup>2</sup> | F | p-value | η <sup>2</sup> | F | p-value | η <sup>2</sup> | F | p-value | η <sup>2</sup> | F | p-value | η <sup>2</sup> | F | p-value | η <sup>2</sup> | F | p-value | η <sup>2</sup> | F | p-value | η <sup>2</sup> | F | p-value | η <sup>2</sup> | F | p-value | η <sup>2</sup> | F | p-value | η <sup>2</sup> | F | p-value | η <sup>2</sup> | F | p-value | η <sup>2</sup> | F | p-value | η <sup>2</sup> | F | p-value | η <sup>2</sup> | F | p-value | η <sup>2</sup> | F | p-value | η <sup>2</sup> | F | p-value | η <sup>2</sup> | F | p-value | η <sup>2</sup> | F | p-value | η <sup>2</sup> | F | p-value | η <sup>2</sup> | F | p-value | η <sup>2</sup> | F | p-value | η <sup>2</sup> | F | p-value | η <sup>2</sup> | F | p-value | η <sup>2</sup> | F | p-value | η <sup>2</sup> | F | p-value | η <sup>2</sup> | F | p-value | η <sup>2</sup> | F | p-value | η <sup>2</sup> | F | p-value | η <sup>2</sup> | F | p-value | η <sup>2</sup> | F | p-value | η <sup>2</sup> | F | p-value | η <sup>2</sup> | F | p-value | η <sup>2</sup> | F | p-value | η <sup>2</sup> | F | p-value | η <sup>2</sup> | F | p-value | η <sup>2</sup> | F | p-value | η <sup>2</sup> | F | p-value | η <sup>2</sup> | F | p-value | η <sup>2</sup> | F | p-value | η <sup>2</sup> | F | p-value | η <sup>2</sup> | F | p-value | η <sup>2</sup> | F | p-value | η <sup>2</sup> | F | p-value | η <sup>2</sup> | F | p-value | η <sup>2</sup> | F | p-value | η <sup>2</sup> | F | p-value | η <sup>2</sup> | F | p-value | η <sup>2</sup> | F | p-value | η <sup>2</sup> | F | p-value | η <sup>2</sup> | F | p-value | η <sup>2</sup> | F | p-value | η <sup>2</sup> | F | p-value | η <sup>2</sup> | F | p-value | η <sup>2</sup> | F | p-value | η <sup>2</sup> | F | p-value | η <sup>2</sup> | F | p-value | η <sup>2</sup> | F | p-value | η <sup>2</sup> | F | p-value | η <sup>2</sup> | F | p-value | η <sup>2</sup> | F | p-value | η <sup>2</sup> | F | p-value | η <sup>2</sup> | F | p-value | η <sup>2</sup> | F | p-value | η <sup>2</sup> | F | p-value | η <sup>2</sup> | F | p-value | η <sup>2</sup> | F | p-value | η <sup>2</sup> | F | p-value | η <sup>2</sup> | F | p-value | η <sup>2</sup> | F | p-value | η <sup>2</sup> | F | p-value | η <sup>2</sup> | F | p-value | η <sup>2</sup> | F | p-value | η <sup>2</sup> | F | p-value | η <sup>2</sup> | F | p-value | η <sup>2</sup> | F | p-value | η <sup>2</sup> | F | p-value | η <sup>2</sup> | F | p-value | η <sup>2</sup> | F | p-value | η <sup>2</sup> | F | p-value | η <sup>2</sup> | F | p-value | η <sup>2</sup> | F | p-value | η <sup>2</sup> | F | p-value | η <sup>2</sup> | F | p-value | η <sup>2</sup> | F | p-value | η <sup>2</sup> | F | p-value | η <sup>2</sup> | F | p-value | η <sup>2</sup> | F | p-value | η <sup>2</sup> | F | p-value | η <sup>2</sup> | F | p-value | η <sup>2</sup> | F | p-value | η <sup>2</sup> | F | p-value | η <sup>2</sup> | F | p-value | η <sup>2</sup> | F | p-value |

|                                              |     |               |     |               |    |               |    |              |     |        |        |       |       |       |       |        |        |       |      |      |     |     |      |      |       |      |      |      |      |      |      |      |      |       |       |       |        |        |       |       |       |       |       |       |        |       |       |       |       |       |       |       |        |       |       |       |
|----------------------------------------------|-----|---------------|-----|---------------|----|---------------|----|--------------|-----|--------|--------|-------|-------|-------|-------|--------|--------|-------|------|------|-----|-----|------|------|-------|------|------|------|------|------|------|------|------|-------|-------|-------|--------|--------|-------|-------|-------|-------|-------|-------|--------|-------|-------|-------|-------|-------|-------|-------|--------|-------|-------|-------|
| Tower Test-Achievement Score                 | 112 | 10.1 ± 2.5    | 111 | 10.05 ± 3.4   | 32 | 9.25 ± 3.1    | 31 | 11.32 ± 2.5  | 282 | 0.908  | 0.34   | 0.003 | 0.019 | 0.89  | 0     | 3.921  | 0.05   | 0.014 | 0.70 | 0.40 | 0.0 | 0.6 | 0.43 | 0.06 | 0.26  | 0.01 | 0.0  | 0.59 | 0.3  | 0.02 | 0.6  | 0.43 | 0.06 | 0.29  | 0.01  | 0.021 | 0.129  | 0.719  | 0     | 0.903 | 0.343 | 0.003 | 6.163 | 0.014 | 0.021  | 4.597 | 0.033 | 0.015 | 0.301 | 0.584 | 0.001 | 4.432 | 0.036  | 0.015 |       |       |
| Tower Test-Time per move (s/total moves)     | 112 | 9.4 ± 3.2     | 111 | 7.99 ± 4      | 32 | 7.66 ± 4.1    | 31 | 10.23 ± 4    | 282 | 1.05   | 0.31   | 0.004 | 0.102 | 0.75  | 0     | 14.919 | <0.001 | 0.05  | 1.99 | 0.15 | 0.0 | 0.3 | 0.53 | 0.0  | 0.13  | <0.0 | 0.0  | 0.2  | 0.00 | 0.15 | 0.0  | 0.2  | 0.59 | 0.0   | 0.13  | <0.0  | 0.045  | 3.053  | 0.082 | 0.01  | 0.507 | 0.477 | 0.002 | 13.21 | <0.001 | 0.044 | 0.035 | 0.852 | 0     | 0.146 | 0.703 | 0     | 11.166 | 0.001 | 0.037 |       |
| Tower Test-Mean first move (s)               | 112 | 9.67 ± 2.9    | 111 | 10.87 ± 3.5   | 32 | 9.94 ± 3.2    | 31 | 12.68 ± 2.6  | 282 | 17.863 | <0.001 | 0.06  | 4.588 | 0.03  | 0.016 | 2.57   | 0.11   | 0.009 | 16.7 | <0.0 | 0.0 | 5.4 | 0.02 | 0.0  | 0.2   | 0.64 | 0.10 | 0.0  | 0.13 | <0.0 | 0.0  | 5.4  | 0.02 | 0.0   | 0.2   | 0.70  | 0.10   | 0.009  | 8.198 | 0.005 | 0.027 | 6.111 | 0.014 | 0.02  | 3.156  | 0.077 | 0.01  | 9.02  | 0.003 | 0.029 | 5.15  | 0.024 | 0.017  | 2.577 | 0.11  | 0.008 |
| Brooks Spatial Task (% correct) <sup>†</sup> | 68  | 60.85 ± 20.9  | 103 | 66.29 ± 19.6  | 28 | 58.86 ± 21.3  | 18 | 58.56 ± 20.8 | 213 | 2.24   | 0.136  | 0.01  | 1.72  | 0.192 | 0.008 | 0.69   | 0.408  | 0.003 | 0.41 | 0.52 | 0.0 | 0.6 | 0.40 | 0.0  | 0.80  | 0.37 | 0.0  | 0.19 | 0.66 | 0.0  | 0.7  | 0.39 | 0.0  | 0.83  | 0.36  | 0.004 | 0.06   | 0.803  | 0     | 0.70  | 0.402 | 0.003 | 0.78  | 0.379 | 0.003  | 1.034 | 0.31  | 0.004 | 0.997 | 0.319 | 0.004 | 1.173 | 0.28   | 0.005 |       |       |
| Corsi block (Product Score)                  | 134 | 22.87 ± 15.1  | 156 | 26.99 ± 16.2  | 41 | 19.51 ± 11.8  | 36 | 31.31 ± 22.2 | 363 | 5.52   | 0.02   | 0.015 | 0.48  | 0.49  | 0.001 | 1.27   | 0.26   | 0.003 | 6.82 | 0.00 | 0.0 | 0.2 | 0.61 | 0.0  | 0.364 | 0.05 | 0.0  | 0.10 | 0.0  | 0.0  | 0.83 | 0    | 3.37 | 0.06  | 0.008 | 2.11  | 0.147  | 0.005  | 0.07  | 0.79  | 0     | 3.05  | 0.082 | 0.008 | 1.607  | 0.206 | 0.004 | 0.055 | 0.815 | 0     | 2.972 | 0.086 | 0.008  |       |       |       |
| SF12 (PCS) <sup>†</sup>                      | 160 | 49.21 ± 9.7   | 136 | 41.52 ± 9.4   | 50 | 44.45 ± 11.6  | 32 | 38.85 ± 10.1 | 374 | 49.55  | <0.001 | 0.115 | 9.95  | 0.002 | 0.023 | 0.68   | 0.41   | 0.002 | 59.5 | <0.0 | 0.1 | 8.5 | 0.00 | 0.0  | 0.53  | 0.46 | 0.0  | 0.45 | <0.0 | 0.1  | 7.3  | 0.00 | 0.0  | 0.45  | 0.001 | 33.28 | <0.001 | 0.074  | 7.69  | 0.006 | 0.017 | 0.39  | 0.533 | 0.001 | 12.03  | 0.001 | 0.027 | 8.334 | 0.004 | 0.018 | 0.22  | 0.639 | 0      |       |       |       |
| SF12 (MCS) <sup>†</sup>                      | 160 | 49.32 ± 8.9   | 136 | 45.8 ± 9.9    | 50 | 47.69 ± 10.4  | 32 | 42.89 ± 10.1 | 374 | 14.52  | <0.001 | 0.037 | 3.23  | 0.073 | 0.008 | 0.28   | 0.601  | 0.001 | 13.1 | <0.0 | 0.0 | 3.4 | 0.06 | 0.0  | 0.25  | 0.61 | 0.0  | 7.91 | 0.00 | 0.0  | 2.4  | 0.11 | 0.0  | 0.21  | 0.64  | 0.001 | 12.51  | <0.001 | 0.032 | 1.73  | 0.19  | 0.004 | 0.15  | 0.695 | 0      | 1.692 | 0.194 | 0.004 | 2.324 | 0.128 | 0.006 | 0.443 | 0.506  | 0.001 |       |       |
| Life Space Questionnaire                     | 95  | 6.27 ± 1.1    | 50  | 6.66 ± 1.3    | 33 | 6.09 ± 1.5    | 11 | 5.91 ± 1     | 185 | 0.05   | 0.83   | 0     | 0.12  | 0.74  | 0.001 | 0.56   | 0.45   | 0.003 | 0.40 | 0.52 | 0.0 | 1.9 | 0.16 | 0.0  | 1.47  | 0.22 | 0.0  | 0.33 | 0.56 | 0.0  | 1.8  | 0.17 | 0.0  | 0.22  | 0.64  | 0.007 | 0.22   | 0.641  | 0.001 | 1.46  | 0.229 | 0.007 | 1.49  | 0.223 | 0.008  | 0.311 | 0.578 | 0.002 | 1.513 | 0.22  | 0.008 | 1.702 | 0.194  | 0.009 |       |       |
| PASE                                         | 124 | 108.55 ± 68.9 | 136 | 105.72 ± 71.1 | 33 | 111.12 ± 78.7 | 34 | 89.31 ± 67.2 | 323 | 0.58   | 0.45   | 0.002 | 0.72  | 0.4   | 0.002 | 0.65   | 0.42   | 0.002 | 1.40 | 0.23 | 0.0 | 0.4 | 0.48 | 0.0  | 0.81  | 0.36 | 0.0  | 3.06 | 0.08 | 0.0  | 1.2  | 0.27 | 0.0  | 0.35  | 0.86  | 0.003 | 1.13   | 0.29   | 0.003 | 1.41  | 0.235 | 0.004 | 1.20  | 0.275 | 0.004  | 1.148 | 0.285 | 0.003 | 1.247 | 0.265 | 0.004 | 1.087 | 0.298  | 0.003 |       |       |
| CPF                                          | 165 | 21.27 ± 4.1   | 159 | 19.19 ± 5     | 56 | 19.39 ± 5.5   | 35 | 18.37 ± 5.4  | 411 | 10.36  | <0.001 | 0.025 | 0.92  | 0.34  | 0.002 | 0.03   | 0.86   | 0     | 22.8 | <0.0 | 0.0 | 5.4 | 0.02 | 0.0  | 1.06  | 0.30 | 0.0  | 0.26 | <0.0 | 0.0  | 7.1  | 0.00 | 0.0  | 1.03  | 0.31  | 0.002 | 23.67  | <0.001 | 0.052 | 6.78  | 0.01  | 0.015 | 0.84  | 0.361 | 0.002  | 3.897 | 0.049 | 0.008 | 8.05  | 0.005 | 0.017 | 0.41  | 0.522  | 0.001 |       |       |
| BDI-II                                       | 124 | 5.99 ± 5.7    | 136 | 12.32 ± 7.7   | 33 | 10.03 ± 10.6  | 33 | 14.21 ± 10.9 | 322 | 35.52  | <0.001 | 0.099 | 1.73  | 0.19  | 0.005 | 1.03   | 0.31   | 0.003 | 50.2 | <0.0 | 0.1 | 7.7 | 0.00 | 0.0  | 1.33  | 0.25 | 0.0  | 0.32 | <0.0 | 0.0  | 4.6  | 0.03 | 0.0  | 0.24  | 0.8   | 0.003 | 29.52  | <0.001 | 0.077 | 4.35  | 0.038 | 0.011 | 1.21  | 0.273 | 0.003  | 6.256 | 0.013 | 0.016 | 5.625 | 0.018 | 0.014 | 0.655 | 0.419  | 0.002 |       |       |
| ABC                                          | 126 | 60.67 ± 28.4  | 159 | 68.85 ± 24.1  | 39 | 58.47 ± 31.3  | 35 | 59.85 ± 26.4 | 355 | 2.60   | 0.11   | 0.007 | 3.20  | 0.07  | 0.009 | 0.67   | 0.41   | 0.002 | 4.06 | 0.04 | 0.0 | 2.3 | 0.12 | 0.0  | 0.71  | 0.4  | 0.0  | 1.95 | 0.16 | 0.0  | 3.3  | 0.06 | 0.0  | 0.41  | 0.66  | 0.002 | 0.74   | 0.391  | 0.002 | 2.59  | 0.108 | 0.007 | 0.75  | 0.388 | 0.002  | 2.842 | 0.093 | 0.008 | 3.151 | 0.077 | 0.008 | 1.123 | 0.29   | 0.003 |       |       |
| Falls in last year (#)                       | 159 | 0.54 ± 2.02   | 162 | 11.15 ± 50.13 | 52 | 3.04 ± 12.84  | 36 | 2.75 ± 3.86  | 405 | 81.04  | <0.001 | 0.167 | 1.77  | 0.18  | 0.004 | 7.86   | 0.01   | 0.019 | 7.90 | 0.00 | 0.0 | 0.4 | 0.50 | 0.0  | 1.97  | 0.16 | 0.0  | 0.00 | 0.0  | 0.2  | 0.59 | 0.0  | 0.16 | 0.7   | 0.005 | 8.82  | 0.003  | 0.021  | 0.32  | 0.572 | 0.001 | 2.37  | 0.125 | 0.006 | 2.12   | 0.146 | 0.005 | 0     | 0.992 | 0     | 0.853 | 0.356 | 0.002  |       |       |       |
| Fear of falling <sup>§</sup>                 | 166 | 1.98 ± 1.31   | 159 | 3.20 ± 1.65   | 55 | 2.30 ± 1.68   | 35 | 3.01 ± 1.20  | 411 | 49.66  | <0.001 | 0.108 | 0.48  | 0.49  | 0.001 | 0.01   | 0.94   | 0     | 60.5 | <0.0 | 0.1 | 0.3 | 0.56 | 0.0  | 2.38  | 0.12 | 0.0  | 0.63 | <0.0 | 0.1  | 1.0  | 0.31 | 0.0  | 0.12  | 0.231 | 0.005 | 47.74  | <0.001 | 0.1   | 1.24  | 0.266 | 0.003 | 1.68  | 0.196 | 0.004  | 6.357 | 0.012 | 0.013 | 2.265 | 0.133 | 0.005 | 0.743 | 0.389  | 0.002 |       |       |
| Quality of Life <sup>§</sup>                 | 161 | 5.51 ± 1.22   | 157 | 5.10 ± 1.14   | 55 | 5.26 ± 1.30   | 34 | 5.16 ± 1.33  | 403 | 2.80   | 0.1    | 0.007 | 0.27  | 0.6   | 0.001 | 1.46   | 0.23   | 0.004 | 12.6 | <0.0 | 0.0 | 0.2 | 0.61 | 0.0  | 0.98  | 0.32 | 0.0  | 5.48 | 0.02 | 0.0  | 0.0  | 0.0  | 0.99 | 0.109 | 0.29  | 0.8   | 0.003  | 9.43   | 0.002 | 0.021 | 0.07  | 0.797 | 0     | 0.99  | 0.321  | 0.002 | 1.644 | 0.201 | 0.004 | 0.014 | 0.907 | 0     | 0.674  | 0.412 | 0.002 |       |

Numbers are bolded for significant p-values adjusted for education, sex, and race. † A parametric test was used for the unadjusted p-values. Abbreviations: MWT, Minute Walk Time; TUG, Timed Up and Go; FSST, Four Square Step Test; BPST, Body Position Spatial Test; MoCA, Montreal Cognitive Assessment; CWIT, Color Word Interference Test; SF12, Short Form 12; PASE, Physical Activity Scale for the Elderly; CPF, Compostiy Physical Function; BDI-II, Beck's Depression Inventory II; ABC, Activities-specific Balance Confidence Scale. P<0.05. Significant *p* and *eta* squared values are bolded.

Supplementary Table S2. Parkinson Medication State.

|                                                 | OFF-PD Meds |               | ON-PD Meds |               |
|-------------------------------------------------|-------------|---------------|------------|---------------|
|                                                 | n           | Mean ± STD    | n          | Mean ± STD    |
| Preferred Backward Gait Speed (m/s)             | 83          | 0.58 ± 0.27   | 82         | 0.67 ± 0.30   |
| 360 degree turn (steps)                         | 82          | 12.12 ± 7.19  | 53         | 9.57 ± 3.69   |
| 360 degree turn (s)                             | 82          | 6.37 ± 6.46   | 53         | 4.72 ± 2.77   |
| TUG-Cognitive (Correct Subtractions Per Second) | 79          | 0.03 ± 0.04   | 105        | 0.43 ± 0.26   |
| Corsi Product Score                             | 82          | 24.70 ± 14.66 | 110        | 30.11 ± 19.11 |

Comparison to determine if medication state influenced the main effect of Parkinson's disease. Significant findings are presented.
